# Supplementary material for: Simultaneous defect regulation by p–n type co-substitution in a Na3V2(PO4)3/C cathode for high performance sodium ion batteries
Source: Royal Society of Chemistry journal article supplement (doi:10.1039/d2dt00958g), 2022-01-01
Supplement: d2dt00958g1.pdf [file d2dt00958g1.pdf]

## Supplementary Material

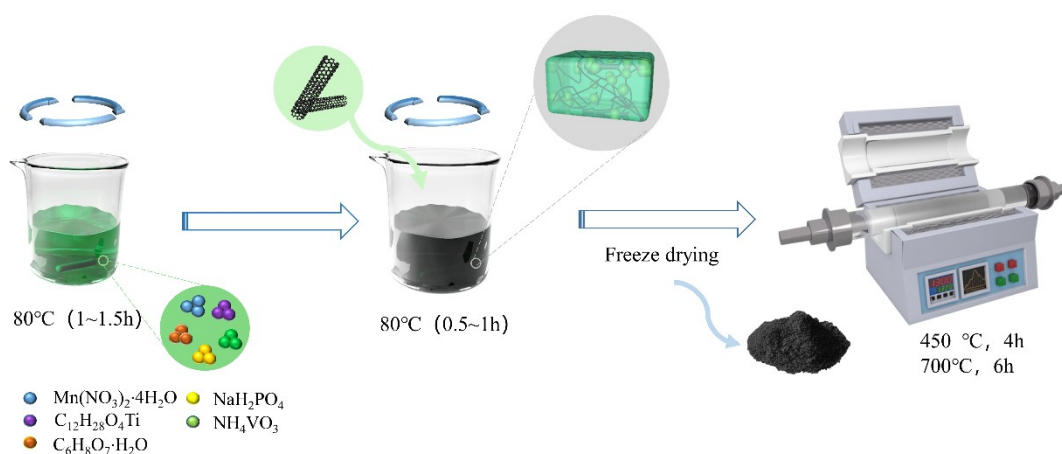

**Fig.S1** Graphic synthesis path of Na<sub>3</sub>V<sub>2-x</sub>Mn<sub>x</sub>Ti<sub>x</sub>(PO<sub>4</sub>)<sub>3</sub>/C@CNTs(x=0.05, 0.15, 0.20).

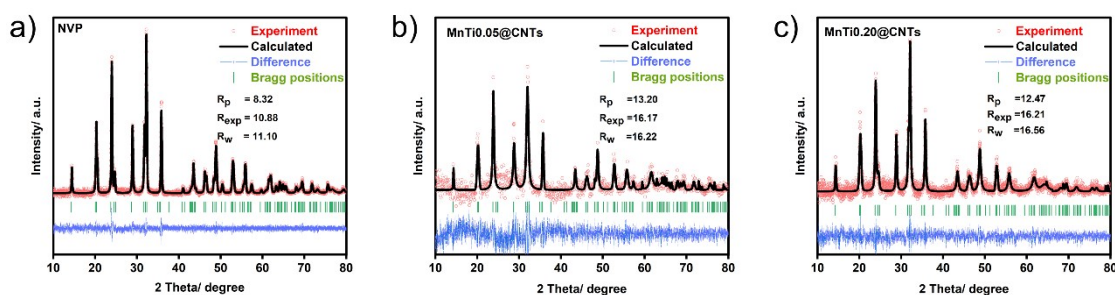

**Fig.S2** (a) Rietveld refined XRD patterns of MnTi0.15@CNTs. (b) Rietveld refined XRD patterns of MnTi0.20@CNTs. (c) Rietveld refined XRD patterns of NVP.

**Table.S1** Chemical compositions of all samples.

| Sample name       | Target composition                                                                                         | Measured composition                                                                                             |
|-------------------|------------------------------------------------------------------------------------------------------------|------------------------------------------------------------------------------------------------------------------|
| NVP               | Na <sub>3</sub> V <sub>2</sub> (PO <sub>4</sub> ) <sub>3</sub>                                             | Na <sub>2.99</sub> V <sub>2.00</sub> (PO <sub>4</sub> ) <sub>2.99</sub>                                          |
| MnTi0.05@CN<br>Ts | Na <sub>3</sub> V <sub>1.95</sub> Mn <sub>0.05</sub> Ti <sub>0.05</sub> (PO <sub>4</sub> ) <sub>3</sub> @C | Na <sub>2.98</sub> V <sub>1.94</sub> Mn <sub>0.04</sub> Ti <sub>0.04</sub> (PO <sub>4</sub> ) <sub>3</sub> @CN   |
| MnTi0.15@CN<br>Ts | Na <sub>3</sub> V <sub>1.85</sub> Mn <sub>0.15</sub> Ti <sub>0.15</sub> (PO <sub>4</sub> ) <sub>3</sub> @C | Na <sub>2.99</sub> V <sub>1.84</sub> Mn <sub>0.14</sub> Ti <sub>0.14</sub> (PO <sub>4</sub> ) <sub>3</sub> @CN   |
| MnTi0.20@CN<br>Ts | Na <sub>3</sub> V <sub>1.80</sub> Mn <sub>0.20</sub> Ti <sub>0.20</sub> (PO <sub>4</sub> ) <sub>3</sub> @C | Na <sub>2.98</sub> V <sub>1.78</sub> Mn <sub>0.19</sub> Ti <sub>0.18</sub> (PO <sub>4</sub> ) <sub>2.99</sub> @C |

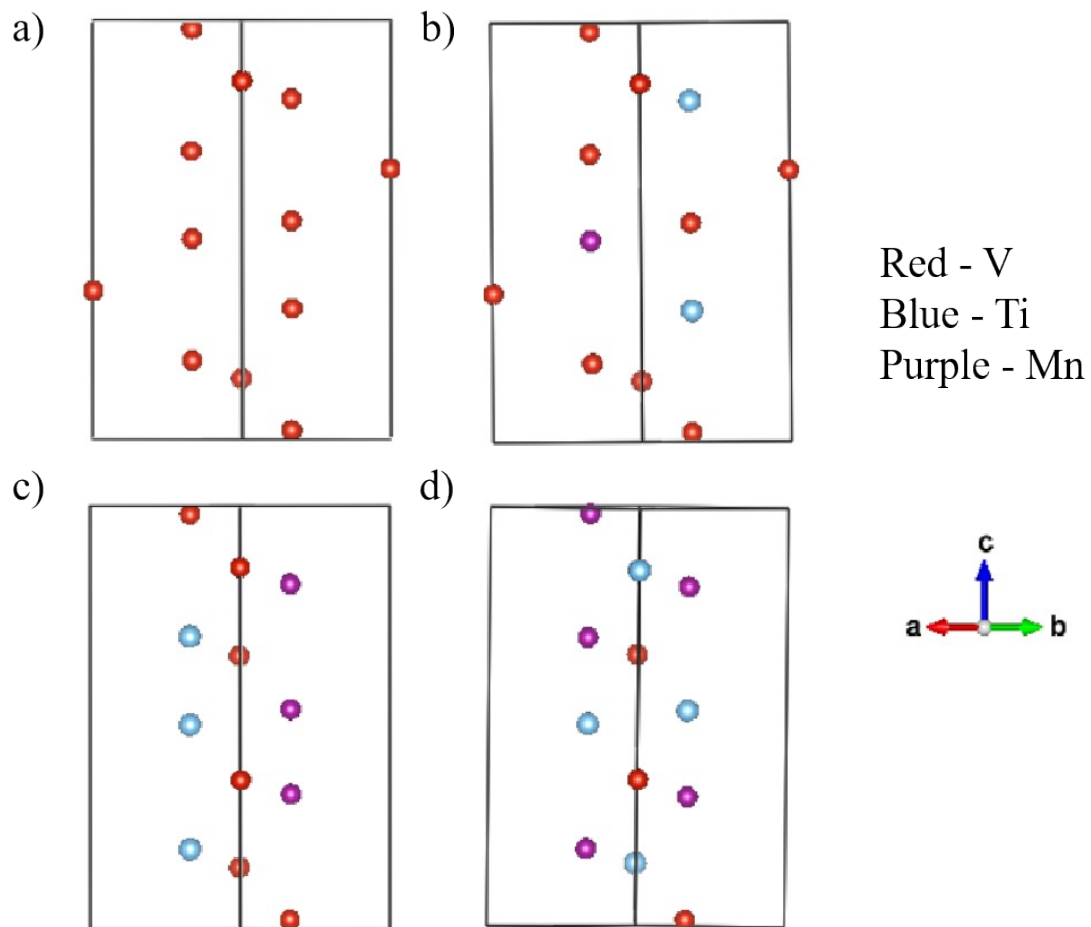

**Fig.S3** The model of structures for all samples by DFT calculation

**Table.S2** The crystal cell parameters of NVP, MnTi0.05@CNTs, MnTi0.15@CNTs and MnTi0.20@CNTs samples obtained from DFT calculation.

| Sample        | a/ Å  | c/ Å  | V/ Å <sup>3</sup> |
|---------------|-------|-------|-------------------|
| NVP           | 8.807 | 21.40 | 1436.77           |
| MnTi0.05@CNTs | 8.824 | 21.47 | 1446.94           |
| MnTi0.15@CNTs | 8.859 | 21.56 | 1460.94           |
| MnTi0.20@CNTs | 8.879 | 21.60 | 1468.12           |

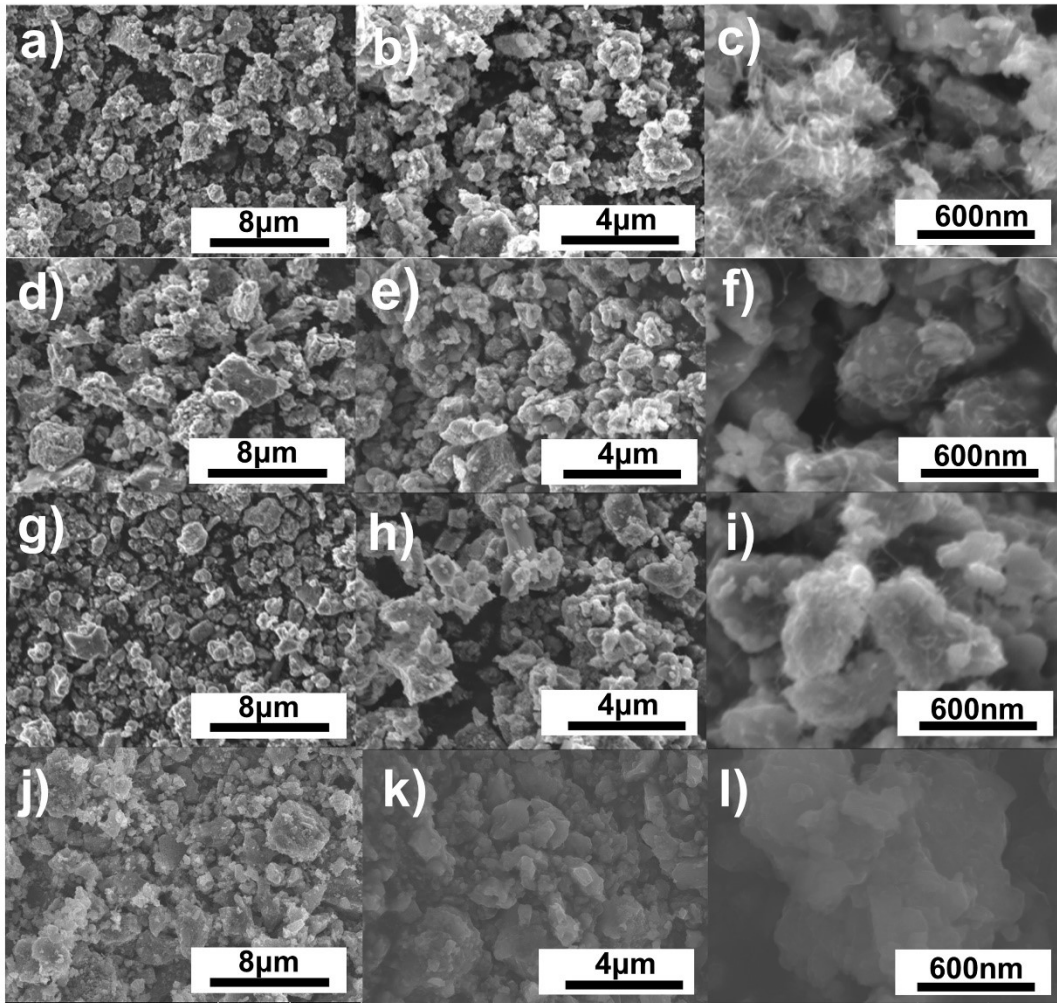

**Fig.S4** SEM images of MnTi<sub>0.05</sub>@CNTs (a-c) MnTi<sub>0.15</sub>@CNTs. (d-f) MnTi<sub>0.20</sub>@CNTs. (g-i) NVP (j-l) at the magnifications of 5k,10k and 50k.

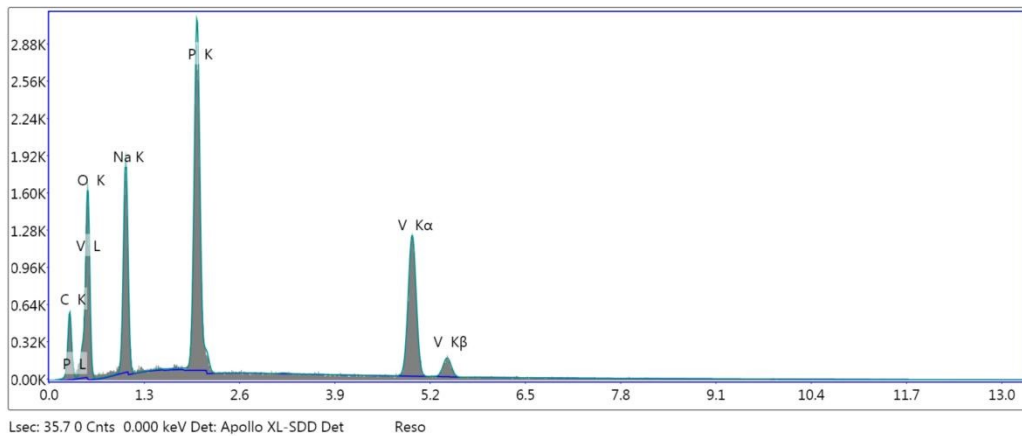

**Fig.S5** EDX spectrum of NVP/C sample.

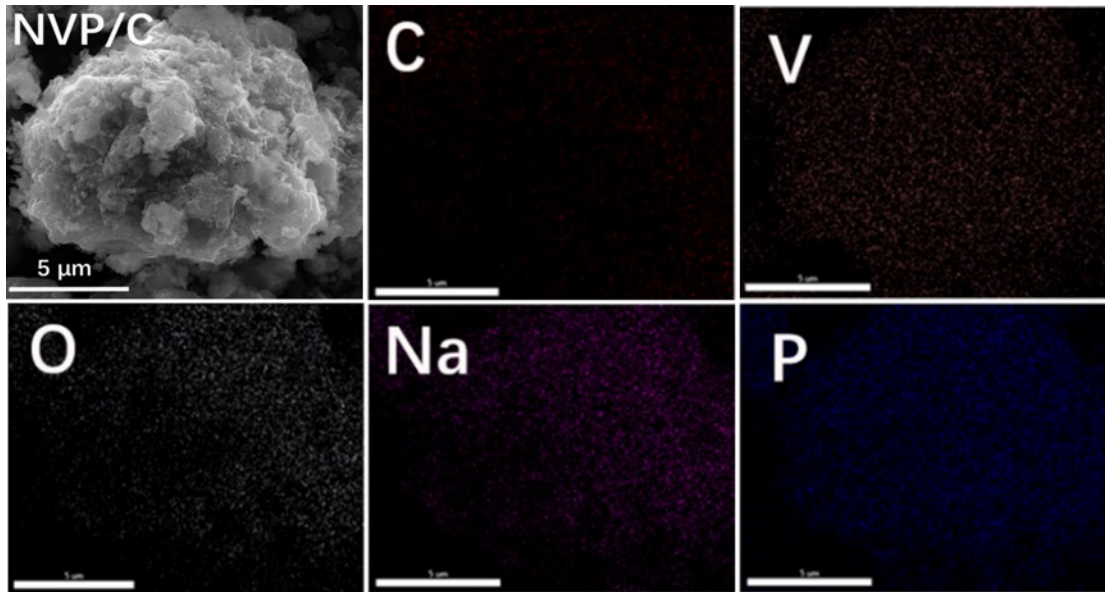

**Fig.S6** Mapping images of undoped NVP/C sample.

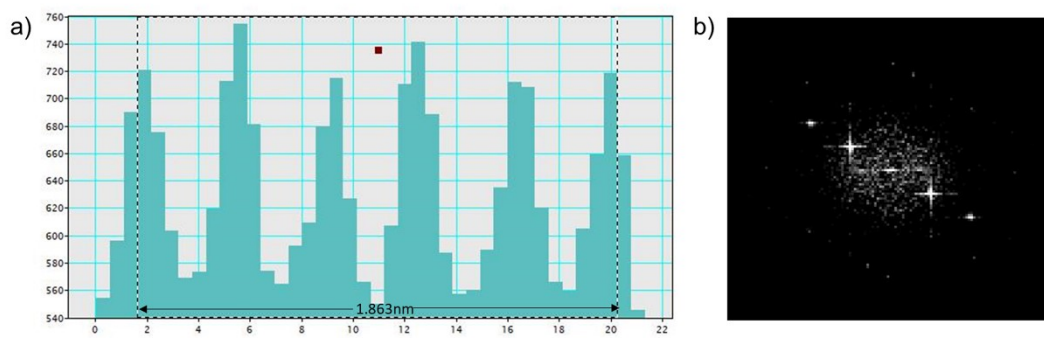

**Fig.S7** (a) The distribution image of lattice spacing of MnTi<sub>0.15</sub>@CNTs. (b) The fast flourier transform images (FFT) of MnTi<sub>0.15</sub>@CNTs.

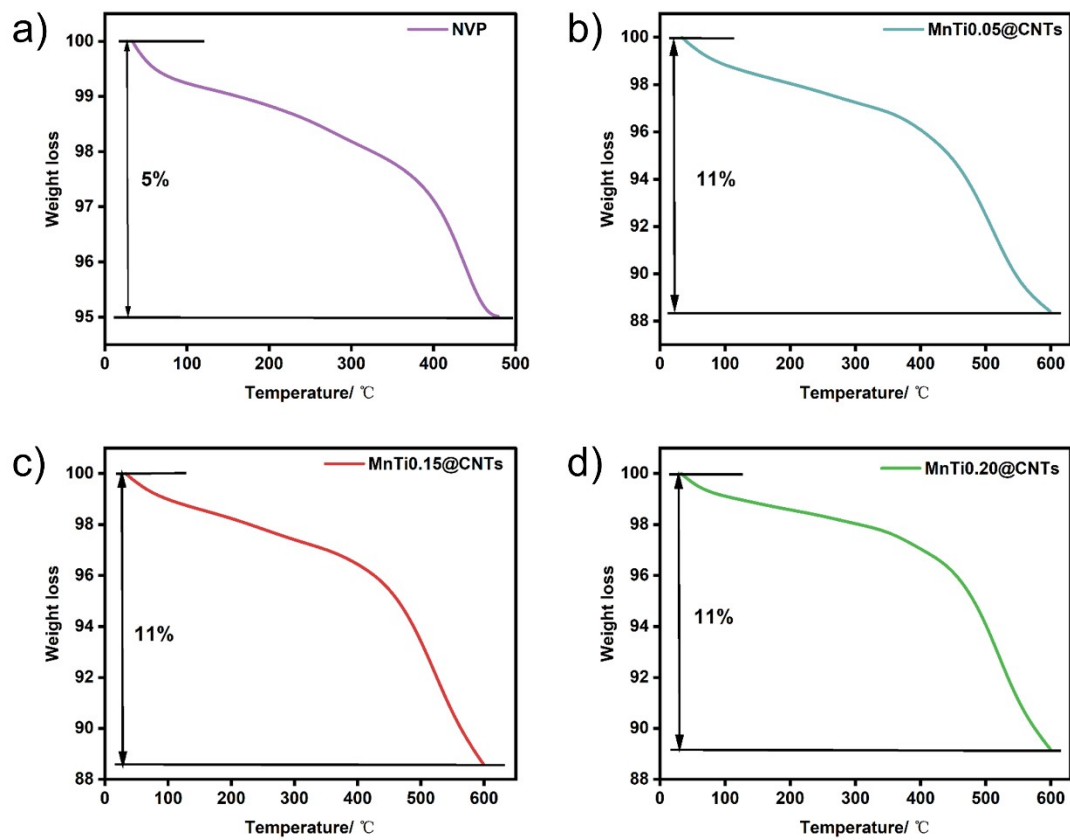

**Fig.S8** The TG spectrum of NVP/C (a), MnTi0.05@CNTs (b), MnTi0.15@CNTs (c) and MnTi0.20@CNTs (d).

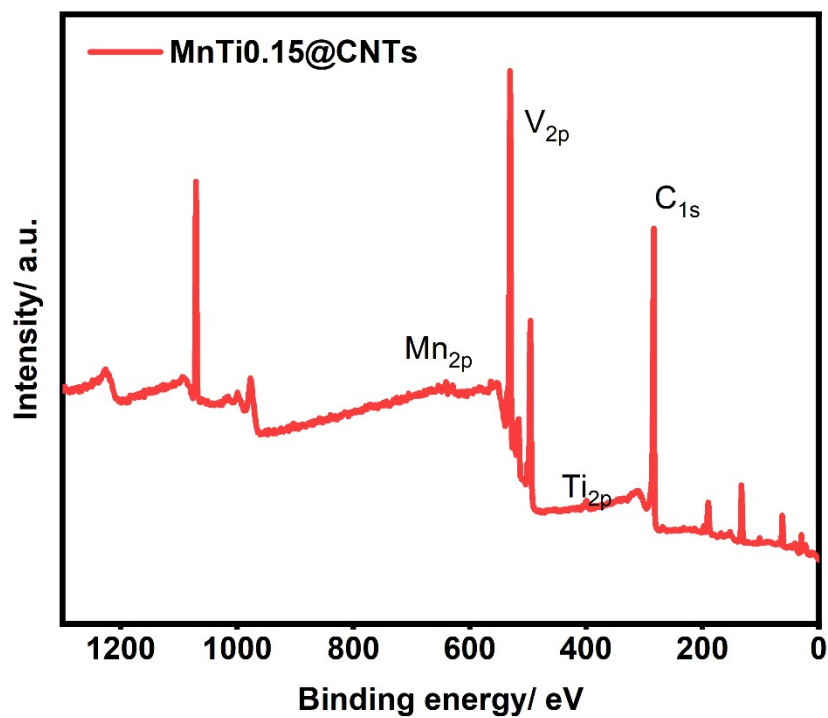

Fig.S9 XPS full spectra of MnTi0.15@CNTs.

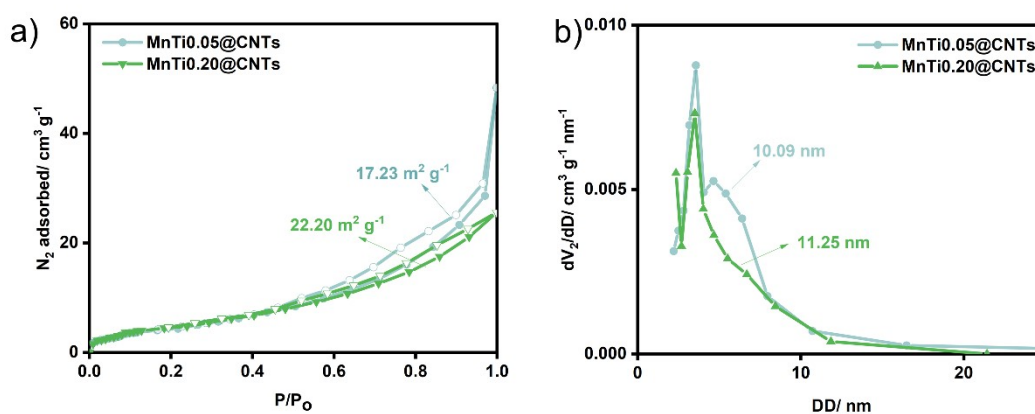

Fig.S10 (a) Isotherm of MnTi0.05@CNTs and MnTi0.20@CNTs. (b) Pore volume-pore size distribution curve of MnTi0.05@CNTs and MnTi0.20@CNTs.



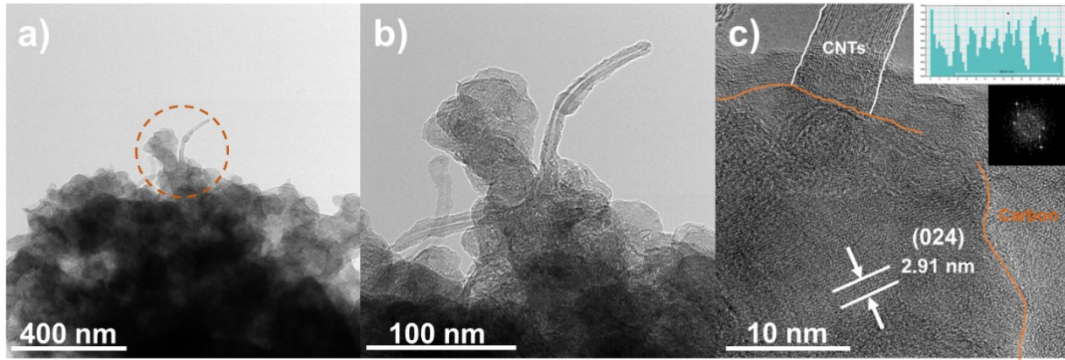

**Fig.S11** TEM images of MnTi<sub>0.15</sub>@CNTs after 1000 cycles at 90C. The insert images in c are the distribution image of lattice spacing and the fast flourier transform images (FFT) of MnTi<sub>0.15</sub>@CNTs.

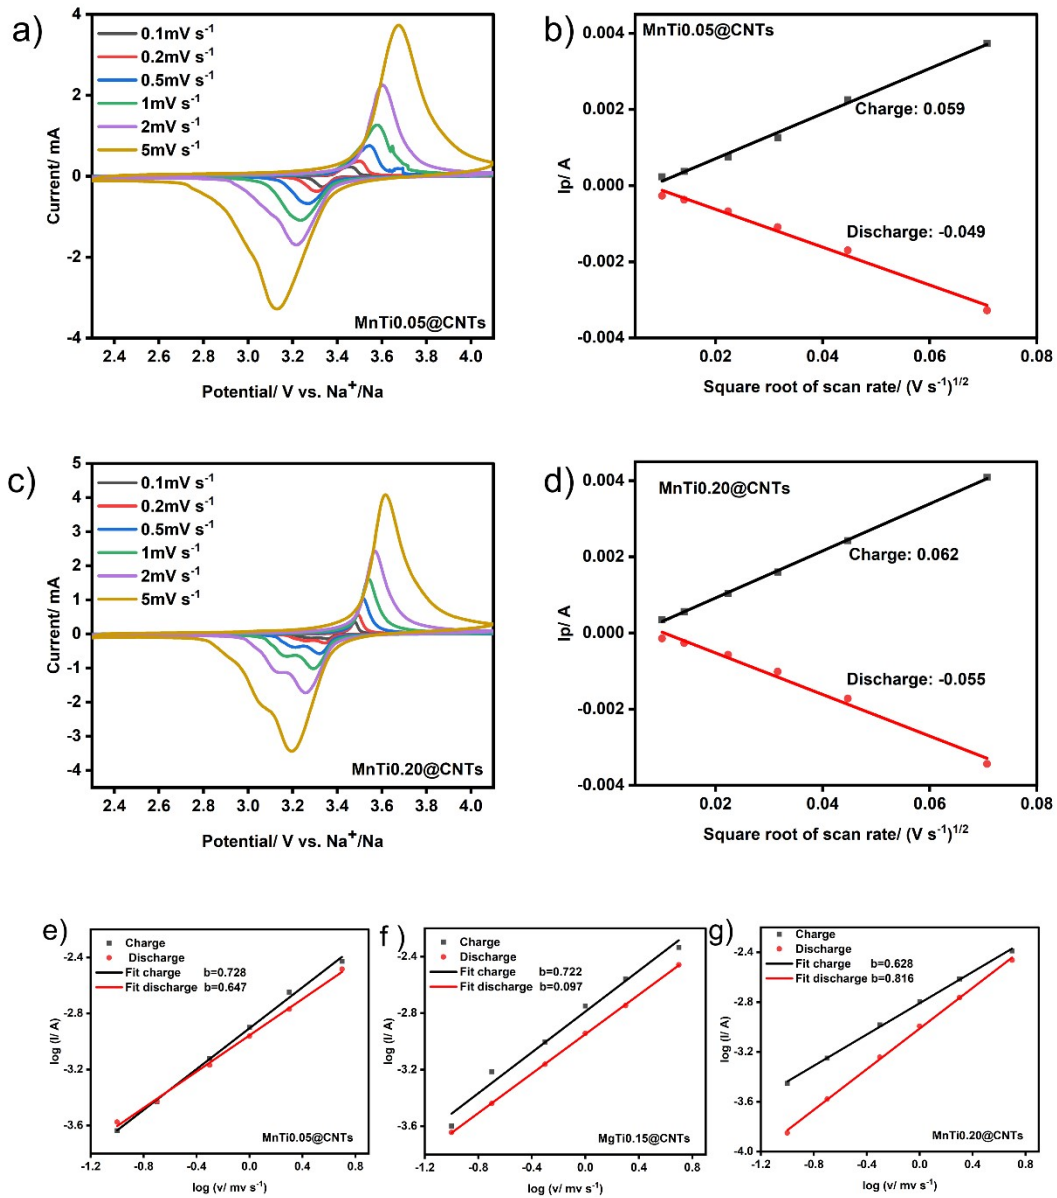

**Fig.S12** (a, c) CV curve of MnTi0.05@CNTs and MnTi0.05@CNTs at different scanning speeds, include 0.1, 0.2, 0.5, 1, 2 and 5 mV s<sup>-1</sup>. (b, d) The linear fitting plot of the peak value. (e-f) Linear fitting graph after taking the logarithm of sweep speed and current of MnTi0.05@CNTs, MnTi0.15@CNTs and MnTi0.20@CNTs.



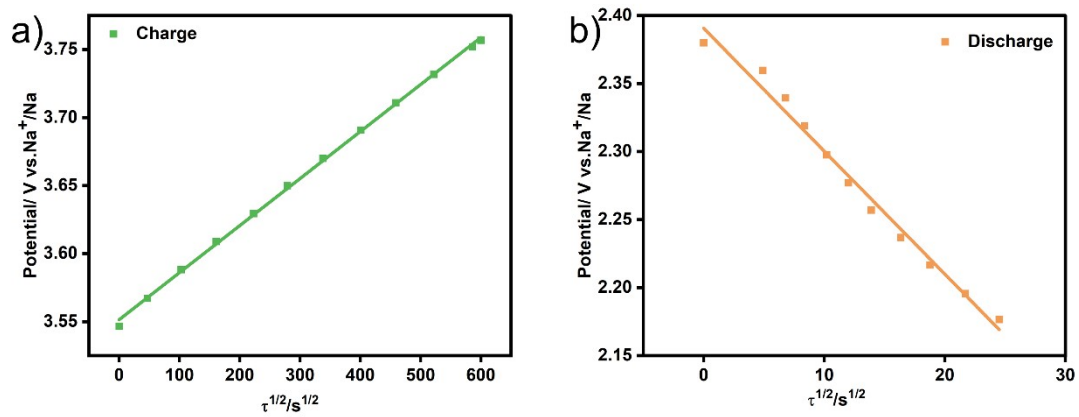

**Fig.S13** Corresponding linear behavior of potential against  $\tau^{1/2}$  in (a) Charge and (b) Discharge process.
